# Supplementary material for: Women’s Empowerment and Children’s Complete Vaccination in the Democratic Republic of the Congo: A Cross-Sectional Analysis
Source: MDPI journal article supplement (doi:10.3390/vaccines9101117), 2021-10-01
Supplement: s1 [file s1]

## Supplementary Materials

**Table S1.** Items of women's empowerment used in the PCA in the DRC.

| Items                                                                      | Code or Unit                                                                    |
|----------------------------------------------------------------------------|---------------------------------------------------------------------------------|
| Considering beating not justified if wife goes out without telling husband | Justified or don't know = 0; not justified = 1                                  |
| Considering beating not justified if wife neglects the children            | Justified or don't know = 0; not justified = 1                                  |
| Considering beating not justified if wife argues with husband              | Justified or don't know = 0; not justified = 1                                  |
| Considering beating not justified if wife refuses to have sex with husband | Justified or don't know = 0; not justified = 1                                  |
| Considering beating not justified if wife burns the food                   | Justified or don't know = 0; not justified = 1                                  |
| Woman's highest education level                                            | Pre-primary/none = 1; Primary = 2; Secondary 1 = 3; Secondary 2 = 4; Higher = 5 |
| Covered by health insurance                                                | Yes = 1; No = 0                                                                 |
| Owning a mobile phone                                                      | Yes = 1; No = 0                                                                 |
| Had used the internet                                                      | Yes = 1; No = 0                                                                 |
| Had used a computer                                                        | Yes = 1; No = 0                                                                 |
| Age difference: woman's age minus husband's age                            | Years                                                                           |
| Woman's age at first marriage                                              | Years                                                                           |
| Woman's age at first birthing                                              | Years                                                                           |

**Table S2.** PCA rotated factor loadings for four factors.

| Items                                                                      | Facto<br>r 1 | Facto<br>r 2 | Facto<br>r 3 | Facto<br>r 4 |
|----------------------------------------------------------------------------|--------------|--------------|--------------|--------------|
| Considering beating not justified if wife goes out without telling husband | 0.795        | 0.010        | 0.037        | -0.005       |
| Considering beating not justified if wife neglects the children            | 0.810        | -0.004       | 0.033        | -0.055       |
| Considering beating not justified if wife argues with husband              | 0.799        | 0.031        | 0.015        | 0.074        |
| Considering beating not justified if wife refuses to have sex with husband | 0.751        | 0.031        | 0.023        | 0.134        |
| Considering beating not justified if wife burns the food                   | 0.694        | 0.013        | 0.020        | 0.077        |
| Women's highest education level                                            | 0.065        | 0.055        | 0.165        | 0.736        |
| Covered by health insurance                                                | 0.030        | 0.087        | 0.167        | 0.469        |
| Owning a mobile phone                                                      | 0.064        | 0.062        | 0.184        | 0.754        |
| Had used the internet                                                      | 0.032        | 0.051        | 0.848        | 0.168        |
| Had used a computer                                                        | 0.030        | 0.035        | 0.873        | 0.076        |
| Age difference: women's age minus husband's age                            | 0.021        | 0.271        | 0.115        | -0.361       |
| Women's age at first marriage                                              | 0.031        | 0.913        | 0.047        | 0.074        |
| Women's age at first birthing                                              | 0.002        | 0.918        | 0.027        | -0.003       |

**Table S3.** Principal components of women's empowerment.

| Factors  | Eigenvalue | Difference | Proportion (%) | Cumulative Proportion (%) |
|----------|------------|------------|----------------|---------------------------|
| Factor 1 | 3.113      | 1.035      | 23.9           | 23.9                      |

|           |       |       |      |       |
|-----------|-------|-------|------|-------|
| Factor 2  | 2.077 | 0.428 | 16.0 | 39.9  |
| Factor 3  | 1.649 | 0.611 | 12.7 | 52.6  |
| Factor 4  | 1.039 | 0.096 | 8.0  | 60.6  |
| Factor 5  | 0.942 | 0.068 | 7.3  | 67.9  |
| Factor 6  | 0.875 | 0.245 | 6.7  | 74.6  |
| Factor 7  | 0.629 | 0.045 | 4.8  | 79.4  |
| Factor 8  | 0.584 | 0.021 | 4.5  | 83.9  |
| Factor 9  | 0.563 | 0.108 | 4.3  | 88.2  |
| Factor 10 | 0.455 | 0.031 | 3.5  | 91.7  |
| Factor 11 | 0.424 | 0.046 | 3.3  | 95.0  |
| Factor 12 | 0.378 | 0.107 | 2.9  | 97.9  |
| Factor 13 | 0.271 |       | 2.1  | 100.0 |

**Table S4.** Demographic variables of women and their children in DRC by vaccination status of children aged 12–23 months (N = 3524)<sup>1</sup>.

| Variables                      | Total     | Complete Vaccination | Incomplete Vaccination | <i>p</i> -Value <sup>2,3</sup> |
|--------------------------------|-----------|----------------------|------------------------|--------------------------------|
| Women's age, mean (SD)         | 29.6(6.9) | 29.8(6.7)            | 29.5(6.9)              | 0.32                           |
| Child's sex, %                 |           |                      |                        | 0.83                           |
| Female                         | 49.9      | 36.7                 | 63.3                   |                                |
| Male                           | 50.1      | 36.5                 | 63.5                   |                                |
| Residence, %                   |           |                      |                        | <0.001                         |
| Rural                          | 60.6      | 30.9                 | 69.1                   |                                |
| Urban                          | 39.4      | 45.3                 | 54.7                   |                                |
| Family wealth index, %         |           |                      |                        | <0.001                         |
| Poor                           | 45.3      | 25.2                 | 74.8                   |                                |
| Middle                         | 19.6      | 36.4                 | 63.6                   |                                |
| Rich                           | 35.1      | 51.4                 | 48.6                   |                                |
| Number of household members, % |           |                      |                        | 0.006                          |
| 1–5                            | 43.6      | 37.8                 | 62.2                   |                                |
| 6–10                           | 50.6      | 35.8                 | 64.2                   |                                |
| ≥10                            | 5.8       | 34.2                 | 65.8                   |                                |
| Number of children aged < 5, % |           |                      |                        | 0.76                           |
| 1                              | 31.9      | 39.7                 | 60.3                   |                                |
| 2                              | 52.1      | 35.6                 | 64.5                   |                                |
| ≥3                             | 16.0      | 33.8                 | 66.3                   |                                |
| Province, %                    |           |                      |                        | <0.001                         |
| Sankuru                        | 1.3       | 2.9                  | 97.1                   |                                |
| Kinshasa                       | 10.1      | 42.7                 | 57.3                   |                                |
| Kongo Central                  | 4.1       | 55.9                 | 44.2                   |                                |
| Kwango                         | 3.2       | 24.9                 | 75.1                   |                                |
| Kwilu                          | 5.6       | 12.8                 | 87.2                   |                                |
| Maindombe                      | 4.1       | 15.6                 | 84.4                   |                                |
| Équateur                       | 2.3       | 32.6                 | 67.4                   |                                |
| Sud Ubangi                     | 2.1       | 28.4                 | 71.6                   |                                |
| Nord Ubangi                    | 0.8       | 18.6                 | 81.4                   |                                |
| Mongala                        | 0.7       | 9.2                  | 90.8                   |                                |
| Tshuapa                        | 0.8       | 16.5                 | 83.5                   |                                |
| Tshopo                         | 3.7       | 21.9                 | 78.1                   |                                |
| Bas Uele                       | 1.2       | 23.1                 | 76.9                   |                                |

|                |     |      |      |
|----------------|-----|------|------|
| Haut Uele      | 1.6 | 21.2 | 78.8 |
| Ituri          | 4.5 | 46.9 | 53.1 |
| Nord Kivu      | 7.6 | 78.6 | 21.4 |
| Sud Kivu       | 9.3 | 52.2 | 47.8 |
| Maniema        | 1.4 | 6.5  | 93.5 |
| Haut Katanga   | 9.4 | 48.0 | 52.0 |
| Lualaba        | 3.0 | 12.1 | 87.9 |
| Haut Lomami    | 2.2 | 36.0 | 64.0 |
| Tanganyika     | 2.9 | 21.6 | 78.4 |
| Lomami         | 3.9 | 34.0 | 66.0 |
| Kasaï Oriental | 4.5 | 33.9 | 66.1 |
| Kasaï Central  | 3.9 | 41.6 | 58.4 |
| Kasaï          | 5.8 | 14.7 | 85.3 |

<sup>1</sup> Weighted using MICS sampling weight. <sup>2</sup> Wald Chi-square tests for categorical variables and Student's t-tests for continuous variables. <sup>3</sup> Here, *p*-values less than 0.05 considered statistically significant.

**Table S5.** Weighted vaccination coverage of children aged 12–23 months in the DRC in the study sample (N = 3524) <sup>1</sup>.

| Vaccines.                         | %    | 95%CI        |
|-----------------------------------|------|--------------|
| BCG <sup>2</sup>                  | 73.2 | (71.7, 74.6) |
| Polio <sup>3</sup>                | 69.8 | (68.3, 71.3) |
| Pentavalent <sup>4</sup>          | 47.3 | (45.7, 49.0) |
| PCV <sup>5</sup>                  | 45.8 | (44.2, 47.4) |
| Measles <sup>6</sup>              | 56.9 | (55.3, 58.5) |
| Yellow Fever <sup>7</sup>         | 55.7 | (54.1, 57.4) |
| Complete vaccination <sup>8</sup> | 36.6 | (35.0, 38.2) |

<sup>1</sup> Weighted using MICS sampling weight. <sup>2</sup> Percentage of children aged 12–23 months who received Bacilli Calmette–Guerin (BCG) vaccine any time prior to the survey. <sup>3</sup> Percentage of children aged 12–23 months who received three doses of polio vaccines (excluding one dose of polio vaccine at birth) at any time before the survey. <sup>4</sup> Percentage of children aged 12–23 months who received three doses of the pentavalent vaccines containing antigens against diphtheria, tetanus, pertussis, hepatitis B, and Hemophilus influenza type b (Hib) at any time before the survey. <sup>5</sup> Percentage of children aged 12–23 months who received three doses of pneumococcal conjugate vaccine (PCV) at any time before the survey. <sup>6</sup> Percentage of children aged 12–23 months who received the measles vaccine at any time before the survey. <sup>7</sup> Percentage of children aged 12–23 months who received the yellow fever vaccine at any time before the survey. <sup>8</sup> Percentage of children aged 12–23 months who received all vaccines recommended below in the National Expanded Program on Immunization (EPI) in the DRC at any time before the survey.

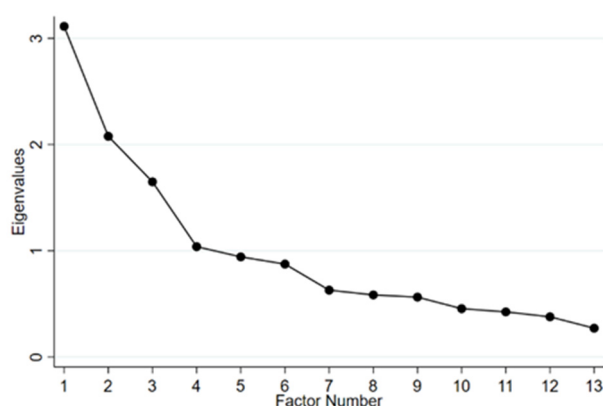

**Figure S1.** Scree plot of the PCA analysis.
